# Supplementary material for: ALS gene overexpression and enhanced metabolism conferring Digitaria sanguinalis resistance to nicosulfuron in China
Source: Frontiers journal article supplement (doi:10.3389/fpls.2023.1290600), 2023-11-17
Supplement: Image_1.PDF [file Image_1.PDF]

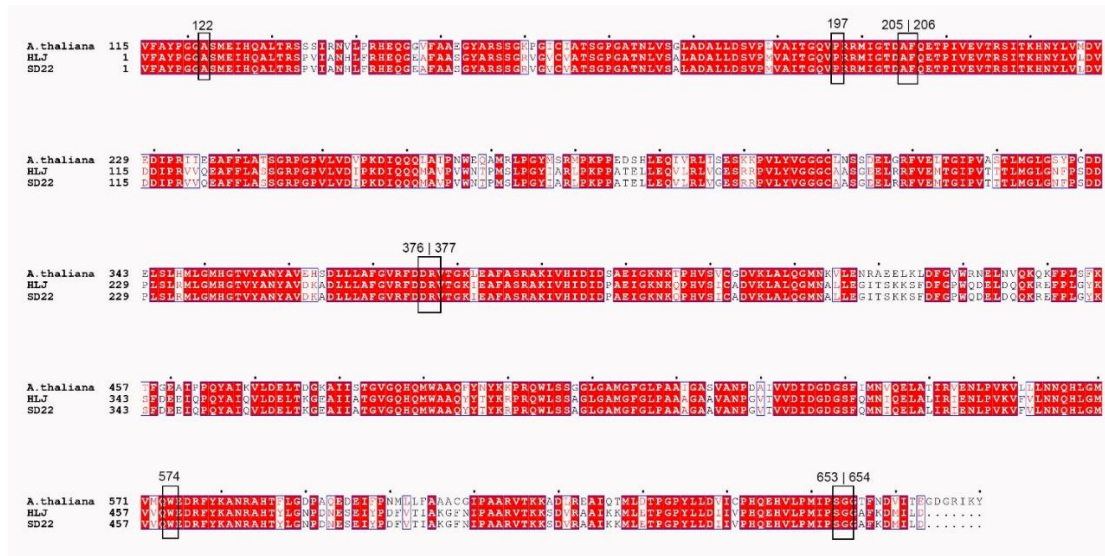

**Supplementary Figure 1.** Alignment of predicted amino acid sequences of *Digitaria sanguinalis* acetolactate synthase. The black boxes indicate the nine amino acid substitution sites known to be associated with weed resistance (numbered according to corresponding sequence of *Arabidopsis thaliana*).
